# Supplementary material for: Proteomic and phosphoproteomic analysis of polyethylene glycol-induced osmotic stress in root tips of common bean (Phaseolus vulgaris L.)
Source: PubMed Central journal article supplement (PMC3871817; doi:10.1093/jxb/ert328), 2013-10-11
Supplement: supp_ert328_jexbot102137_file001.pdf [file supp_ert328_jexbot102137_file001.pdf]

**Proteomic and phosphoproteomic analysis of polyethylene glycol-induced osmotic stress in root tips of common bean (*Phaseolus vulgaris* L.)**

Zhong-Bao Yang<sup>1,2</sup>, Dejene Eticha<sup>3</sup>, Hendrik Führs<sup>4</sup>, Dimitri Heintz<sup>5</sup>, Daniel Ayoub<sup>6</sup>, Alain Van Dorsselaer<sup>6</sup>, Barbara Schlingmann<sup>7</sup>, Idupulapati Madhusudana Rao<sup>8</sup>, Hans-Peter Braun<sup>9</sup>, Walter Johannes Horst<sup>2\*</sup>

<sup>1</sup>The Key Laboratory of Plant Cell Engineering and Germplasm Innovation, Ministry of Education; College of Life Science, Shandong University, Jinan 250100, PR China;

<sup>2</sup>Institute for Plant Nutrition, Leibniz Universität Hannover, Herrenhäuser Str. 2, 30419 Hannover, Germany; <sup>3</sup>Yara GmbH, Hanninghof 35, 48249 Dülmen; <sup>4</sup>Applied Research and Advisory Service Agro, K+S KALI GmbH, Bertha-von-Suttner-Strasse 7, 34131 Kassel, Germany;

<sup>5</sup>Institut de Biologie Mooléculaire des Plantes (IBMP), 28 rue Goethe, CNRS-UPR2357, Université de Strasbourg, 67083 Strasbourg, France; <sup>6</sup>Laboratoire de Spectrométrie de Masse Bio-Organique, Université de Strasbourg, IPHC, 25 rue Becquerel, 67087 Strasbourg

<sup>7</sup>Institute of BioPhysics, Leibniz Universität Hannover, Herrenhäuser Str. 2, D-30419 Hannover, Germany; <sup>8</sup>International Center for Tropical Agriculture (CIAT), AA 6713, Cali, Colombia; <sup>9</sup>Institute of Plant Genetics, Leibniz Universität Hannover, Herrenhäuser Str. 2, D-30419 Hannover, Germany

<sup>9</sup>Institute of Plant Genetics, Leibniz Universität Hannover, Herrenhäuser Str. 2, D-30419 Hannover, Germany

## Supplementary material

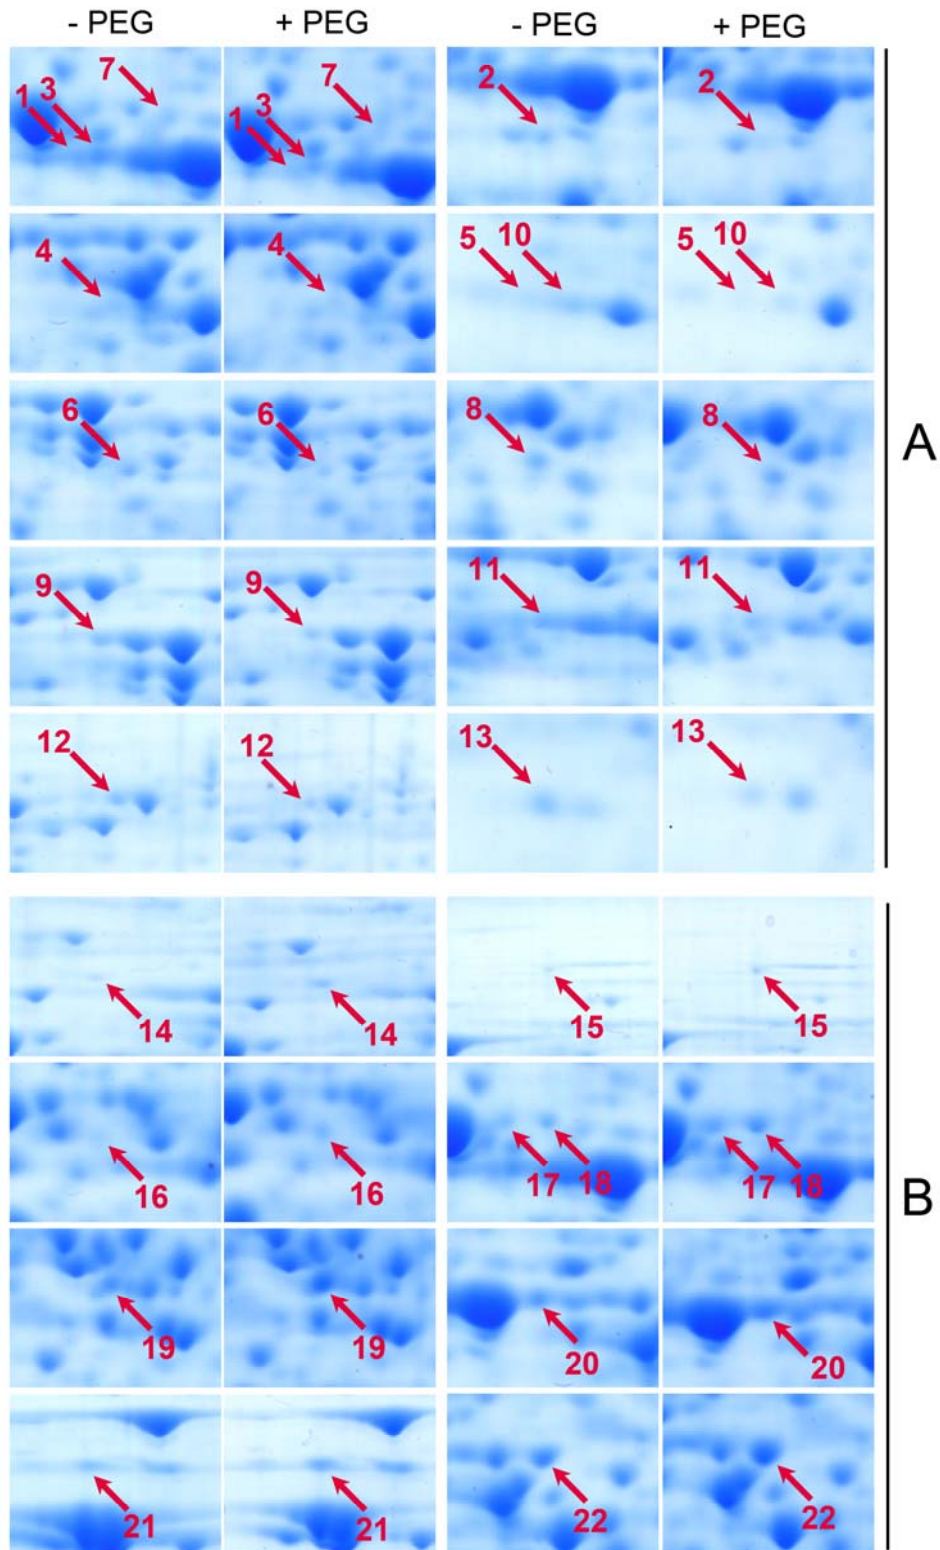

**Figure S1** Close-ups of significantly decreased (A) and increased (B) protein spots in response to PEG in the root tips of common bean genotype VAX 1. The Coomassie-stained 2D IEF/SDS-PAGE gels of the total soluble proteins are shown in Fig. 2.

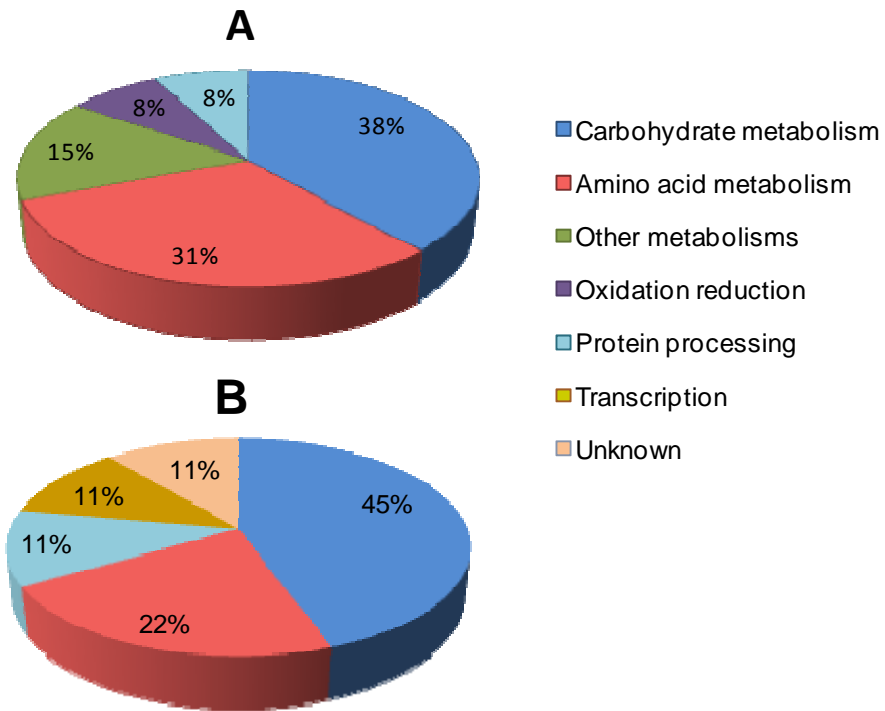

**Figure S2** Functional categories of the 22 significantly decreased (A) and increased (B) proteins in response to PEG-induced osmotic stress in the root tips of common bean genotype VAX 1. The identifications of these 22 proteins by nano LC-MS/MS are shown in Table 1.

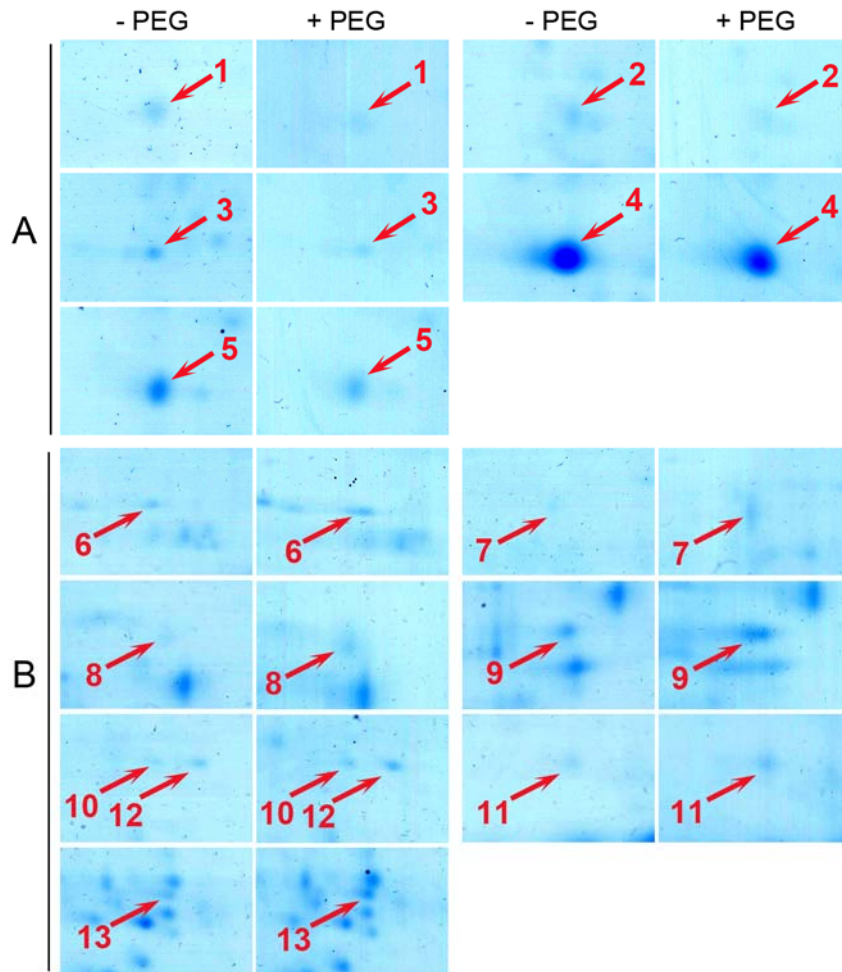

**Figure S3** Close-ups of significantly decreased (A) and increased (B) apoplastic protein spots in response to PEG in the root tips of common bean genotype VAX 1. The Coomassie-stained 2D IEF/SDS-PAGE gels of the apoplastic proteins are shown in Fig. 4.

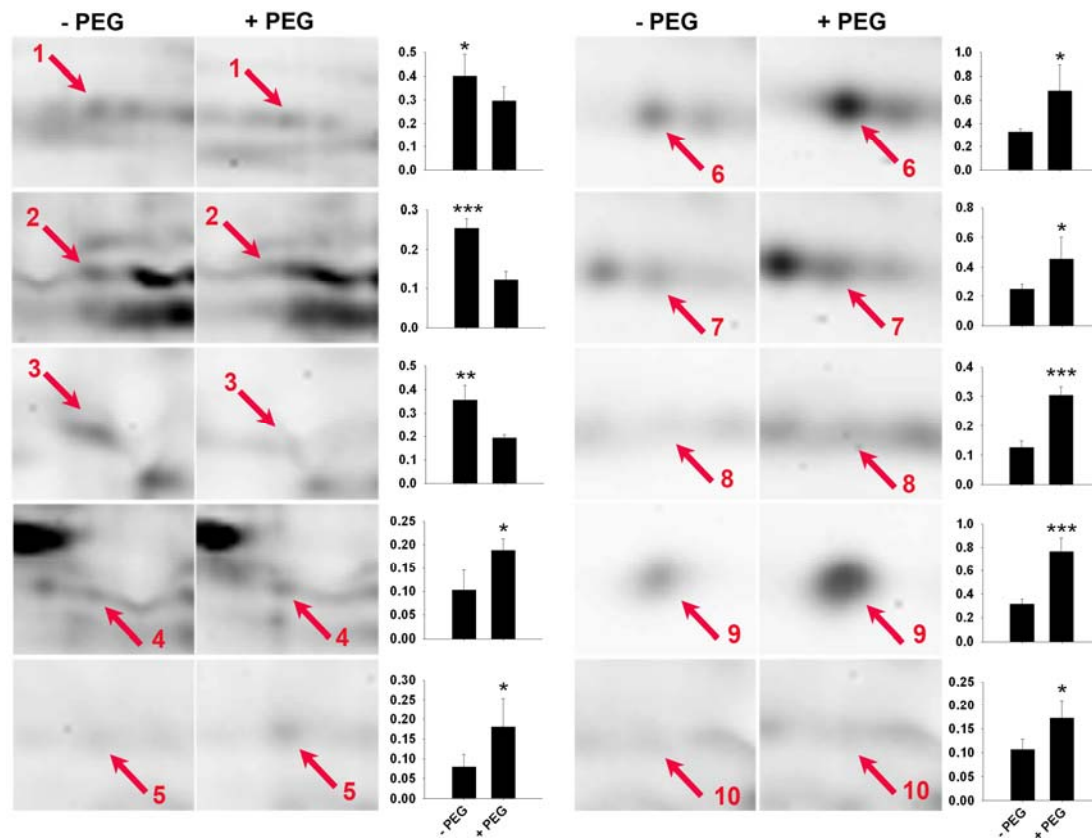

**Figure S4** Close-ups and the relative volume of the 10 significantly decreased and increased phosphorylated protein spots in response to PEG in the root tips of common bean genotype VAX 1. The Pro-Q DPS-stained 2D IEF/SDS-PAGE gels of the phosphorylated proteins are shown in Fig. 5A.

```

AAB00554 MAEETQNKYE TAESSEVEVQ DRGVDFDLGK KKEEEKPQEE VIVTEFEKIT VSEKKKEEG 60
Spot 6 -AEETQNKYE TAESSEVEVQ DRGVDFDLGK --EEEKPQEE VIVTEFEK-- -----
Spot 7 -AEETQNKYE TAESSEVEVQ DRGVDFDLGK ----- ----- -----
Spot 9 -AEETQNKYE TAESSEVEVQ DR----- ----- ----- -----
AAB00554 EKKHSLLEKL HRSDSSSSSS SEEEGEDGEK KKKKKKEKKE KKKIEEKIEG YHKEDTSPVP 120
Spot 6 ---HSLLEK- ----- ----- ----- -----IEG YHKEDTSPVP
Spot 7 ----- ----- ----- ----- ----- -----
Spot 9 ----- ----- ----- ----- ----- -----
AAB00554 EKVEVVESEE KKGFLLEKI KLPGHKKSEE AAAPPPPPPA ATSSHEGEA KEKKGILEKI 180
Spot 6 EKVEVVESEE K----- -KSEE AAAPPPPPPA ATSSHEGEA K-----
Spot 7 --VEVVESEE K----- -KSEE AAAPPPPPPA ATSSHEGEA K-----
Spot 9 ----- ----- ----- ----- ----- -----
AAB00554 KEKLPGYHSK TEEKEKESG GH 202
Spot 6 ----- ----- ----- ----- ----- -----
Spot 7 ----- ----- ----- ----- ----- -----
Spot 9 ----- ----- ----- ----- ----- -----

```

**Figure S5** Prediction of potential phosphorylation sites of the dehydrin protein. The phosphorylation sites were analyzed with KinasePhos 2.0 software (<http://kinasephos2.mbc.nctu.edu.tw/index.html>, Wong et al., 2007) online. Highlighted are peptides which may undergo phosphorylation.
